# Supplementary material for: Hypermethylated gene ANKDD1A is a candidate tumor suppressor that interacts with FIH1 and decreases HIF1α stability to inhibit cell autophagy in the glioblastoma multiforme hypoxia microenvironment
Source: PubMed Central journal article supplement (PMC6318269; doi:10.1038/s41388-018-0423-9), 2018-08-06
Supplement: 41388_2018_423_MOESM1_ESM.pdf [file 41388_2018_423_MOESM1_ESM.pdf]

## Supplementary Information (SI)

**Hypermethylated gene ANKDD1A is a candidate tumor suppressor that interacts with FIH1 and decreases HIF1 $\alpha$  stability to inhibit cell autophagy in the glioblastoma multiforme hypoxia microenvironment**

**Jianbo Feng et al.**

## Supplementary Data

**Table S1.** Tumor type, grade, genetic and mutational profile of patient derived cells that use in this article.

| Abbreviation in manuscript | Name       | Tumor Grade  | Tumor Type                | Olig2 | GFAP | Ki67  | p53      | MGMT methylation | IDH1 | 1p/19q deleted |
|----------------------------|------------|--------------|---------------------------|-------|------|-------|----------|------------------|------|----------------|
| PG-1                       | G20151216  | grade IV     | Glioblastoma              | + +   | +    | 30% + | Mutation | Methylated       | Wild | 1p36           |
| PG-2                       | G20151104  | grade IV     | Glioblastoma              | +     | +    | 40% + | Wild     | Methylated       | Wild | 1p36&19q13     |
| PG-3                       | G20151124B | GBM          | Glioblastoma multiforme   | +     | +    | 30% + | Mutation | Methylated       | Wild | 1p36           |
| PG-4                       | G20151124C | grade II     | Diffuse astrocytic glioma | +     | +    | 2% +  | Mutation | Methylated       | Wild | 1p36           |
| PG-5                       | G20151125  | GBM          | Glioblastoma multiforme   | +     | +    | 10% + | Mutation | Methylated       | Wild | 19q13          |
| PG-6                       | G20151105  | grade II-III | Astrocytoma               | +     | +    | 10% + | Mutation | Methylated       | Wild | 1p/19q intact  |

**Figure S1, related to Result 3**

**ANKDD1A** *Homo sapiens*

ankyrin repeat and death domain containing 1A

GO Process (0) GO Function (0) GO Component (0)

EXTERNAL DATABASE LINKOUTS  
[HGNC](#) | [VEGA](#) | [Entrez Gene](#) | [RefSeq](#) | [UniprotKB](#) | [Ensembl](#) | [HPRD](#)

[Download 3 Published Interactions For This Protein](#)

**Stats & Options**

**Current Statistics** **Publications:** 3  
 High Throughput Low Throughput  
**3 (100%)** **3 Physical Interactions** **0 (0%)**  
**0 (0%)** **0 Genetic Interactions** **0 (100%)**

**Search Filters** Customize how your results are displayed...  
 No Filter: Show All Associations

Switch View: **Interactors (2)** Interactions (3) Network

Displaying 2 total unique interactors  
 Sort By: **[Evidence]** [Alphabetical]

**HIF1AN** | FIH1 2 [details]  
 hypoxia inducible factor 1, alpha subunit inhibitor  
 UBI FAT10

**RPGRIP1L** | CORS3, FTM, JBTS7, MKS5, NPHP8, PPP1R134 1 [details]  
 RPGRIP1-like  
 UBI

FIH1 and RPGRIP1L were predicted to interact with ANKDD1A by BioGRID screen.

Figure S2, related to Result 5

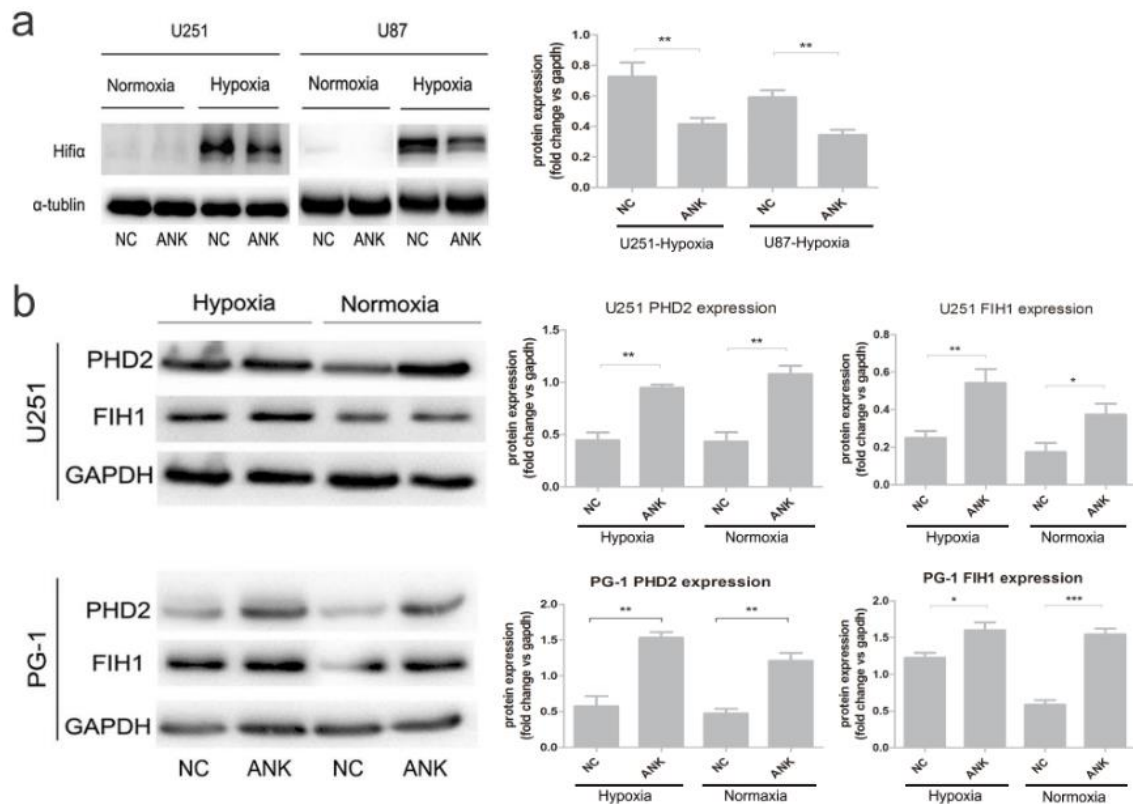

Quantification assay of western blotting of Figure 5a (a) and Figure 5e (b).

**Figure S3, related to Result 5**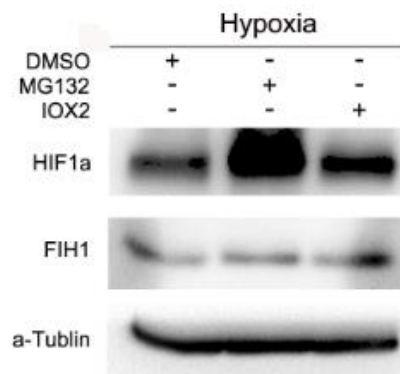

MG132 (proteasome inhibitor) or IOX2 (PHD2-specific inhibitor) increased the HIF1 $\alpha$  protein level but had no noticeable effect on FIH1 in GBM cells under hypoxia.
