# Supplementary material for: Hypermethylated gene ANKDD1A is a candidate tumor suppressor that interacts with FIH1 and decreases HIF1α stability to inhibit cell autophagy in the glioblastoma multiforme hypoxia microenvironment
Source: PubMed Central journal article supplement (PMC6318269; doi:10.1038/s41388-018-0423-9), 2018-08-06
Supplement: 41388_2018_423_MOESM2_ESM.pdf [file 41388_2018_423_MOESM2_ESM.pdf]

## **Supplementary Material and Methods**

### **In Vitro Invasion Assay**

Cells invasion was measured using 24-well Fluoroblok inserts (8 $\mu$ m Becton Dickinson). Briefly, U251, U87, PG-1, PG-2 or PG-3 cells (50,000 cells per insert) were suspended in serum-free medium over a Matrigel coating (Becton Dickinson), and the lower chamber was cultured with 10% FBS-containing growth medium as a chemoattractant. Hydroxyurea was added into cells culture medium to inhibit cells growth which eliminates the effect of proliferation on cells invasion. Cells which invaded after 16 hr were stained in 4 mg/ml Calcein AM dye, and then counted under a light microscope.

### **CCK-8 cell proliferation assay**

Cells proliferation was determined using a cell counting kit-8 (CCK-8) (Dojido, Kumamoto, Japan) assay according to the manufacturer's instructions. Briefly, 3,000 cells in 150  $\mu$ l of medium were plated on a 96-well plate and cultured for 1-3 days. After the incubation period, 15  $\mu$ l of CCK-8 was added to each well, and cells were further incubated for 3 h at 37  $^{\circ}$ C. Absorbance was then measured at 450 nm using a microplate reader (Thermo Fisher Scientific, USA).

### **EDU staining assay**

Cells DNA replication was determined using EdU kit (RiboBio, Guangzhou, China) according to the manufacturer's protocol. Briefly,

5,000 cells in 150  $\mu$ l of medium were plated on a 96-well plate, and after cultured for 4 hr, medium was replaced by 10 $\mu$ M EdU medium and cultured for another 12hr. After Apollo staining and nuclear staining, cells were counted using a fluorescent microscope.

### **Apoptosis measurement**

Apoptosis was assessed by labeling cells with annexin-V-FITC and propidium iodide (PI). Cells were then analyzed (n = 20,000) by flow cytometry (Accuri C6 cytometer, Becton-Dickinson). Annexin V-positive cells (PI negative and positive) were counted as apoptotic.

### **Immunohistochemistry**

Mice tumor paraffin sections were dewaxed, rehydrated and antigen retrieved. Sections were blocked with 3% hydrogen peroxide for 10 min and normal goat serum for 30 min at room temperature. Then the sections were incubated with anti-FLAG (Sigma-Aldrich), HIF1 $\alpha$  (Proteintech) and KI67 (Bosterbio) antibodies for 12 h at 4  $^{\circ}$ C and incubated with biotinylated secondary antibody (Maxim Biotechnologies) for 30 min at room temperature and streptavidin conjugated HRP (Maxim Biotechnologies) for 30min. Staining was visualized with 3,3-diaminobenzidine (DAB; Maxim Biotechnologies) and counterstained with hematoxylin.
